# Supplementary material
Source: publisher figshare collection journal article supplement (https://gsajournals.figshare.com/ndownloader/files/13477385)
Supplement: Supplementary file 1 [file 13477385]

## Sheet: Sheet1
Table S7. Duplicated Y-linked exons in the new assembly
Gene	exon	contigs	exon_start	exon_end	exon_start_contig	exon_end_contig
kl-3	1	Y_Contig15	1	1126	238004	239129	*
kl-3	1	Y_Contig15	1	1126	249238	250365	*
kl-3	2	Y_Contig153	1	104	17976	18079
kl-3	3	Y_Contig153	1	176	18136	18311
kl-3	3	Y_Contig153	177	1288	18366	19477
kl-3	4	Y_Contig115	1	169	124797	124629
kl-3	5	Y_Contig115	1	406	124568	124163
kl-3	6	Y_Contig84	1	212	37737	37526
kl-3	7	Y_Contig84	1	517	37473	36957
kl-3	8	Y_Contig84	1	130	26893	26764
kl-3	9	Y_Contig84	1	2213	26710	24498
kl-3	10	Y_Contig84	1	1385	24434	23050
kl-3	11	Y_Contig148	1	335	53966	53632
kl-3	12	Y_Contig19	1	809	73650	72842
kl-3	13	Y_Contig19	1	1461	72567	71107
kl-3	14	Y_Contig162	1	2876	119	2994
kl-3	15	Y_Contig162	1	179	3050	3228
kl-3	16	Y_Contig12	1	672	255326	254655
ORY	1	Y_Contig161	1	162	8289	8128	*
ORY	1	Y_Contig161	1	162	13140	12977	*
ORY	2	Y_Contig161	1	350	8060	7735	*
ORY	2	Y_Contig161	1	350	12900	12551	*
ORY	3	Y_Contig27	1	624	140212	140835
ORY	4	Y_Contig27	1	317	140890	141206
ORY	5	Y_Contig7	1	179	112092	112270
ORY	6	Y_Contig7	1	644	112551	113194
ORY	7	Y_Contig7	1	139	113248	113386
ORY	8	Y_Contig7	1	330	376639	376968
Ppr-Y	1	Y_Contig156	1	208	105108	104901
Ppr-Y	2	Y_Contig156	1	284	1022	739
Ppr-Y	3	Y_r6_ppry	1	179	151	329
Ppr-Y	4	Y_000026F_com	1	577	499578	500155	*
Ppr-Y	4	Y_000026F_com	1	577	443920	443344	*
Ppr-Y	5	Y_000026F_com	1	335	104303	103969
Ppr-Y	6	Y_Contig146	1	127	241643	241769	*
Ppr-Y	6	Y_Contig146	1	127	246613	246739	*
Ppr-Y	6	Y_Contig146	1	127	254231	254360	*
Ppr-Y	6	Y_Contig146	1	127	256548	256677	*
Ppr-Y	6	Y_Contig146	1	127	260867	260996	*
WDY	1	Y_000026F_com	1	610	1124286	1123677	*
WDY	1	Y_000026F_com	1	610	1130282	1130891	*
WDY	1	Y_Contig15	1	610	237534	236949	*
WDY	1	Y_Contig15	1	610	248768	248183	*
WDY	2	Y_Contig159	2	1081	77557	76478	*
WDY	2	Y_Contig159	933	1081	43434	43286	*
WDY	3	Y_Contig24	1	455	47987	47533
WDY	4	Y_Contig24	1	199	47472	47274
WDY	5	Y_Contig24	1	201	11417	11217	*
WDY	5	Y_Contig24	1	201	15160	14960	*
WDY	6	Y_Contig24	1	848	11155	10308	*
WDY	6	Y_Contig24	1	848	14898	14051	*
*The duplicared exons
